# Supplementary material
Source: PubMed Central journal article supplement (PMC4565288)
Supplement: ijcem0008-11052-f3.pdf [file ijcem0008-11052-f3.pdf]

## Metabolomics in bladder cancer

**Supplementary Table 1.** QUADAS-2 Evaluation

| Study             | Risk of bias      |            |                    |                 | Applicability concerns |            |                    |
|-------------------|-------------------|------------|--------------------|-----------------|------------------------|------------|--------------------|
|                   | Patient selection | Index test | Reference standard | Flow and timing | Patient selection      | Index test | Reference standard |
| Pasikanti et al.  | L                 | L          | L                  | U               | L                      | L          | L                  |
| Srivastava et al. | L                 | L          | L                  | L               | L                      | L          | L                  |
| Putluri et al.    | L                 | L          | L                  | U               | L                      | L          | L                  |
| Lin et al.        | H                 | L          | U                  | U               | L                      | L          | U                  |
| Cao et al.        | L                 | L          | L                  | U               | L                      | L          | L                  |
| Alberice et al.   | H                 | L          | U                  | U               | L                      | L          | U                  |
| Bansal et al.     | H                 | U          | L                  | L               | H                      | H          | H                  |
| Dettmer et al.    | H                 | L          | H                  | H               | H                      | L          | U                  |
| Pasikanti et al.  | L                 | L          | L                  | U               | L                      | L          | L                  |
| Tripathi et al.   | L                 | L          | U                  | U               | L                      | L          | U                  |
| Jin et al.        | L                 | L          | L                  | L               | L                      | L          | L                  |

L= Low Risk; H = High Risk; U = Unclear Risk.
